# Supplementary material for: Scale-Up Preparation of Crocins I and II from Gardenia jasminoides by a Two-Step Chromatographic Approach and Their Inhibitory Activity Against ATP Citrate Lyase
Source: MDPI journal article supplement (doi:10.3390/molecules26113137), 2021-05-24
Supplement: s1 [file s1]

Supplementary Materials

# Scale-up preparation of crocins I and II from *Gardenia Jasminoides* by a two-step chromatographic approach and their inhibitory activity on ATP citrate lyase

Shuguang Guan <sup>1,2</sup>, Qiaoli Pu <sup>1</sup>, Yanan Liu <sup>3</sup>, Honghong Wu <sup>4</sup>, Wenbo Yu <sup>1</sup>, Zifeng Pi <sup>2,5,\*</sup>, Shu Liu <sup>2</sup>, Fengrui Song <sup>2</sup>, Jingya Li <sup>3</sup> and De-an Guo <sup>1,3,\*</sup>

<sup>1</sup> College of Pharmacy, Changchun University of Chinese Medicine, Changchun, 130117, China; gsgwww@126.com (S.G.); Puqiaolily@163.com (Q.P.); a511cs@126.com (W.Y.)

<sup>2</sup> Changchun Institute of Applied Chemistry, Chinese Academy of Sciences, Changchun, 130022, China; mslab20@ciac.ac.cn (S.L.); songfr@ciac.ac.cn (F.S.)

<sup>3</sup> Shanghai Institute of Materia Medica, Chinese Academy of Sciences, Shanghai, 201203, China; ynlou@sim.ac.cn (Y.L.); jyli@sim.ac.cn (J.L.)

<sup>4</sup> University of Chinese Academy of Sciences, Beijing, 100049, China; s18-wuhonghong@sim.ac.cn

<sup>5</sup> Changchun Sunnitech Co., Ltd., Changchun, 130061, China

\* Correspondence: mslab21@ciac.ac.cn (Z.P.); daguo@sim.ac.cn (D.G.); Tel.: +86-21-50271516; Fax: +86-21-50271516 (D.G.)

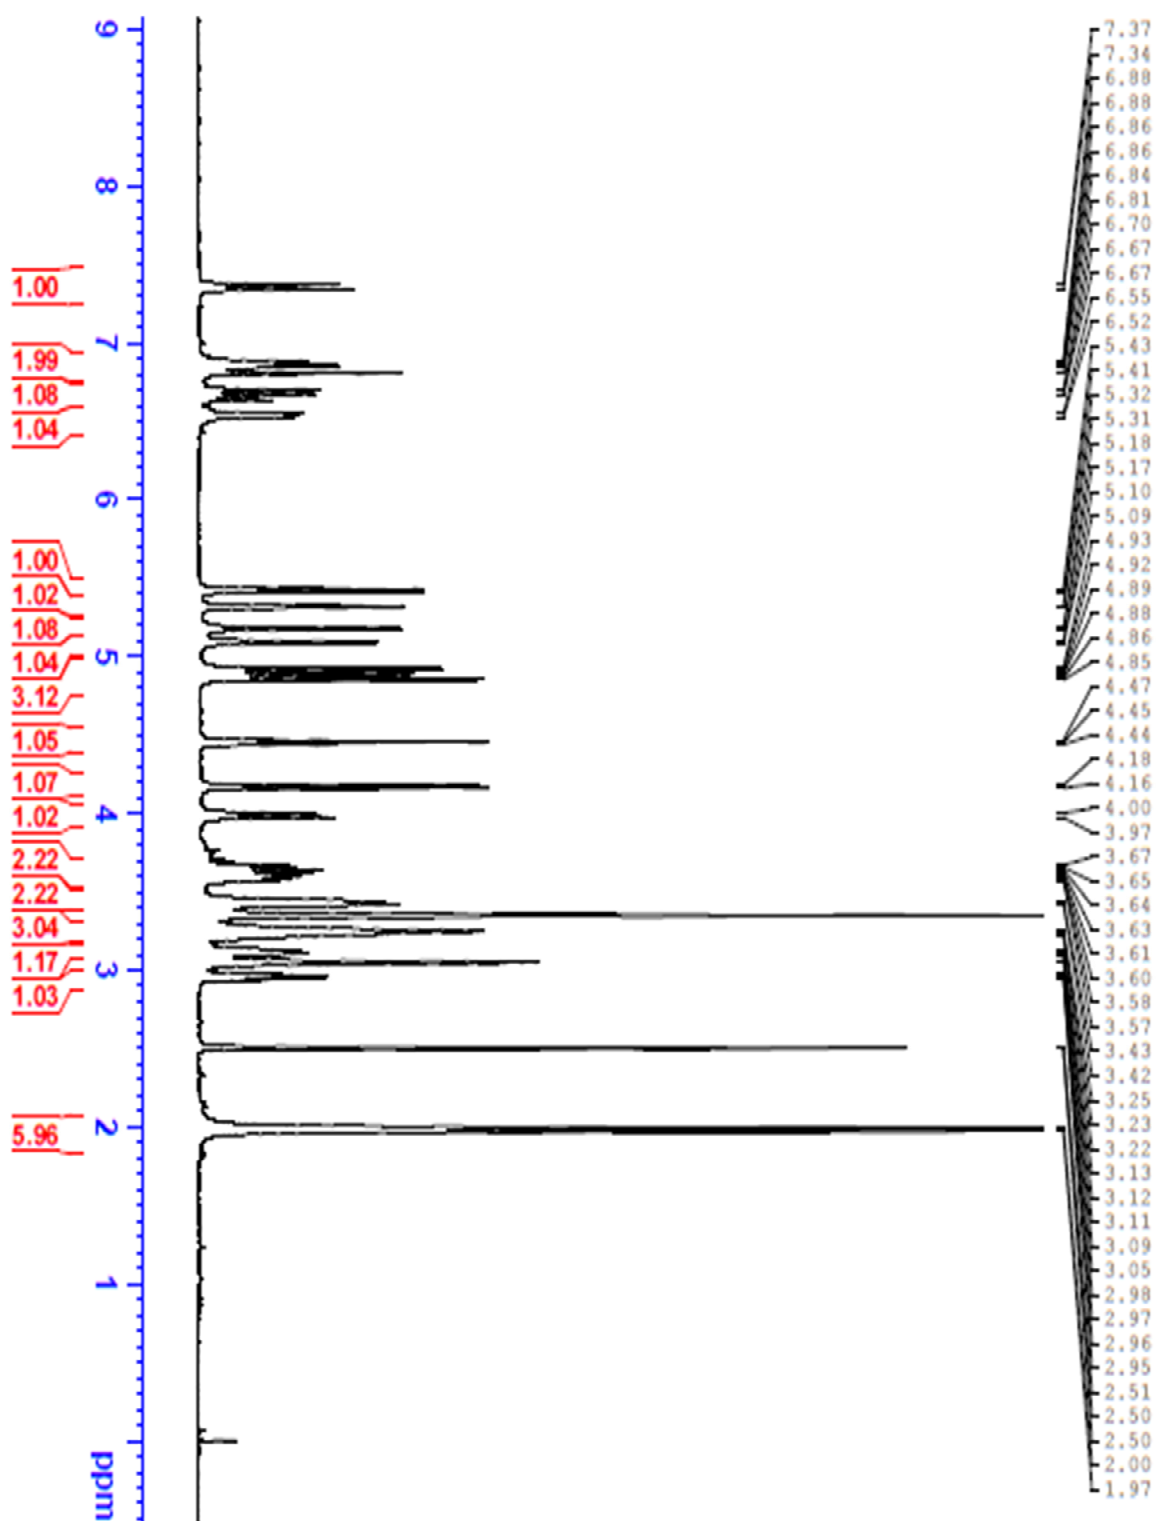

Figure S1. 400 MHz <sup>1</sup>H-NMR spectrum of compound 1 (in DMSO-*d*<sub>6</sub>) .

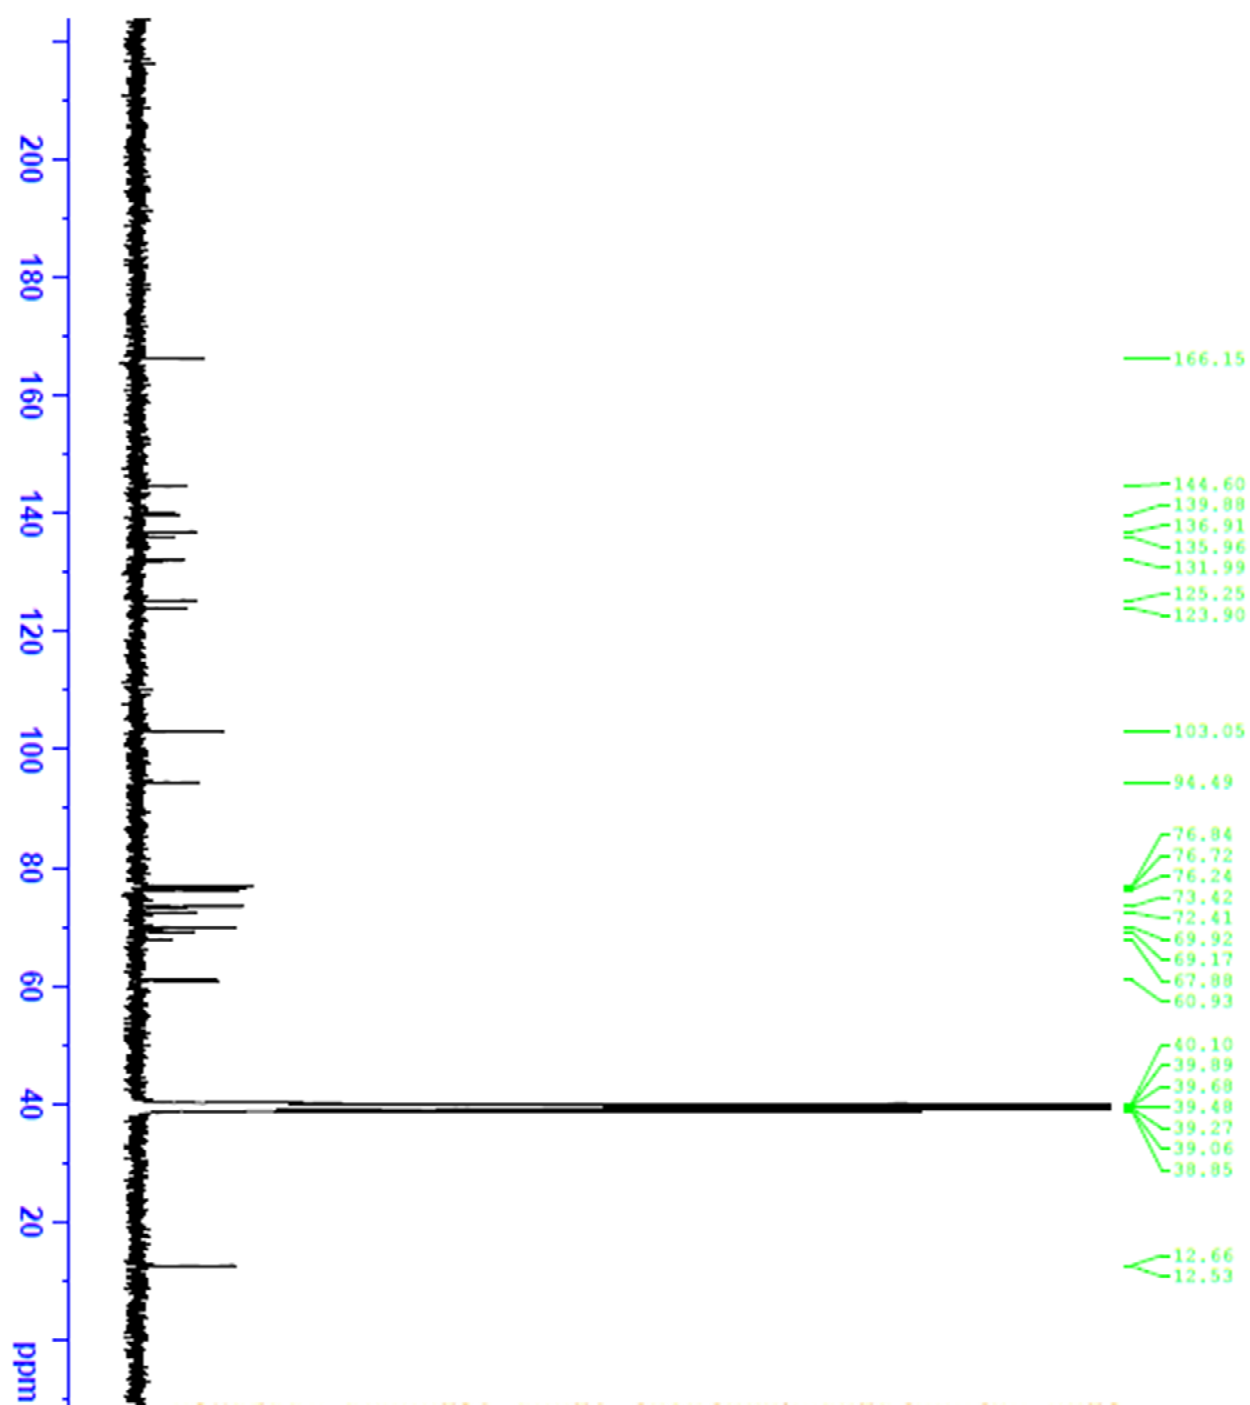

Figure S2. 100 MHz  $^{13}\text{C}$ -NMR spectrum of compound 1 (in  $\text{DMSO}-d_6$ )

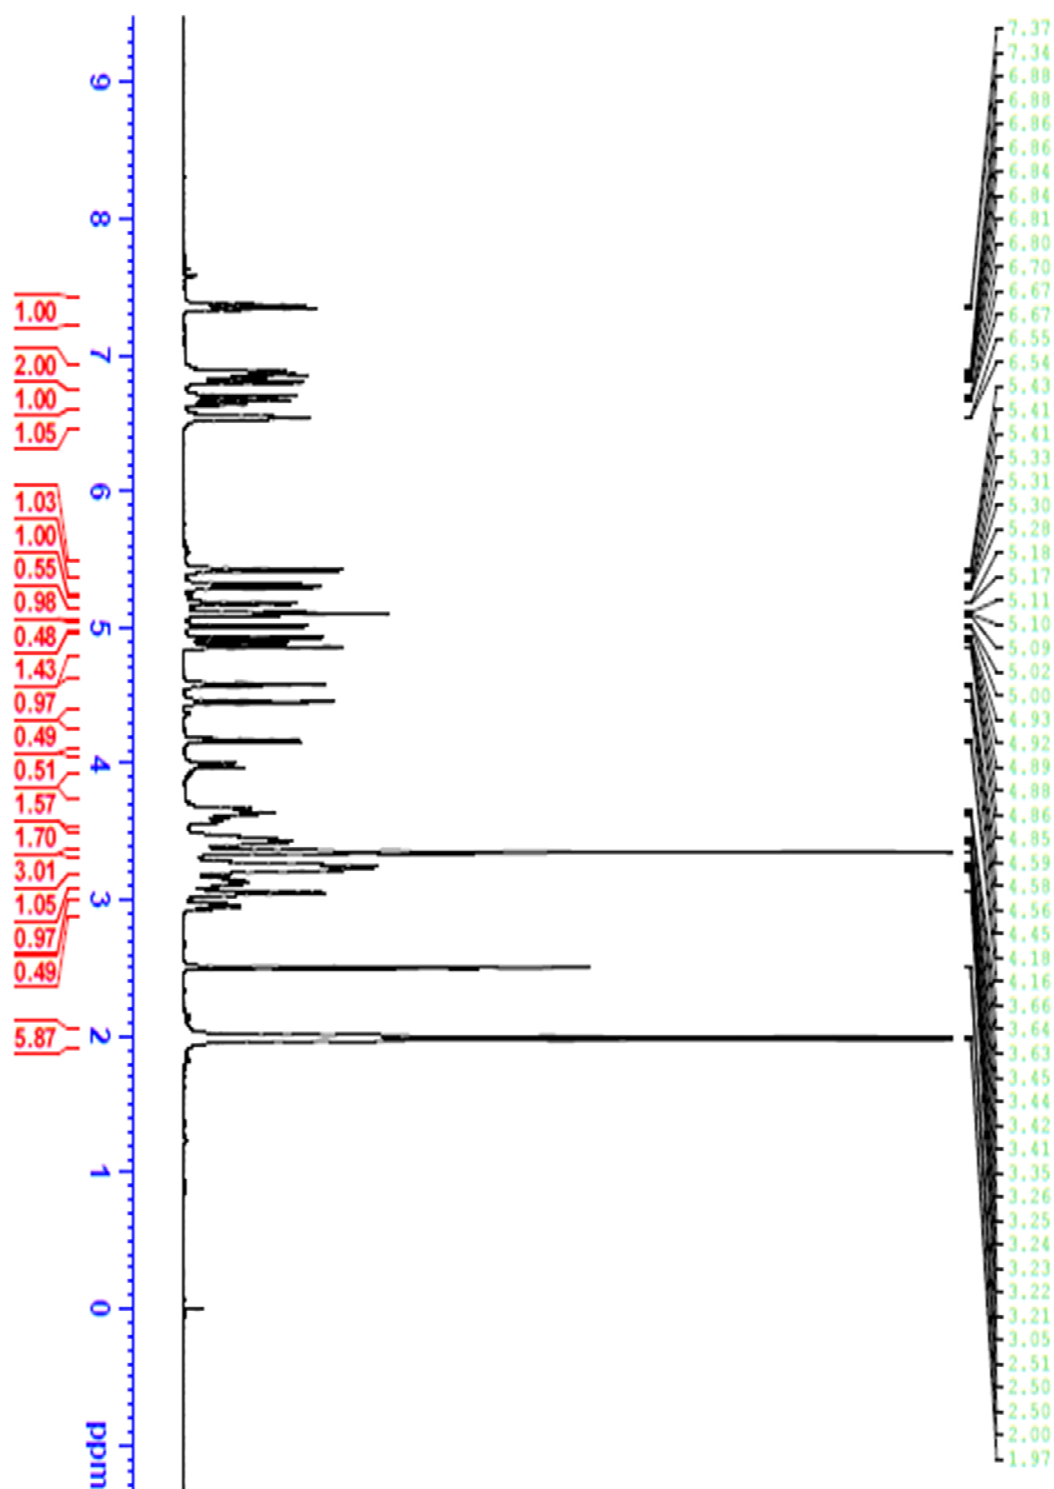

Figure S3. 400 MHz <sup>1</sup>H-NMR spectrum of compound 2 (in DMSO-*d*<sub>6</sub>)

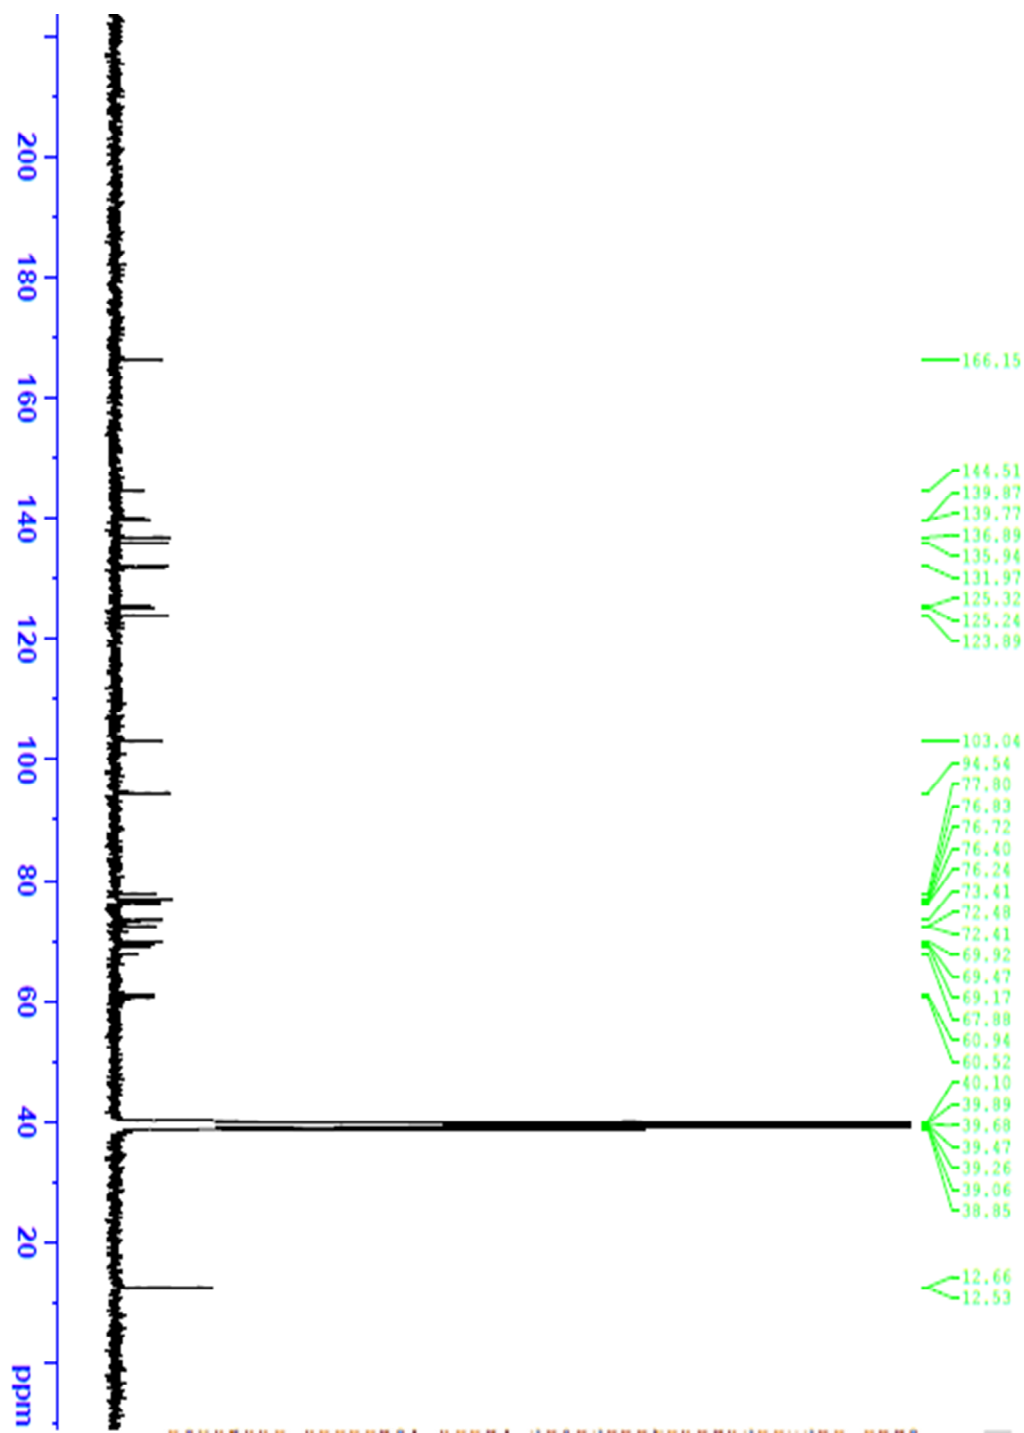

Figure S4. 100 MHz  $^{13}\text{C}$ -NMR spectrum of compound 2 (in  $\text{DMSO-}d_6$ ) .

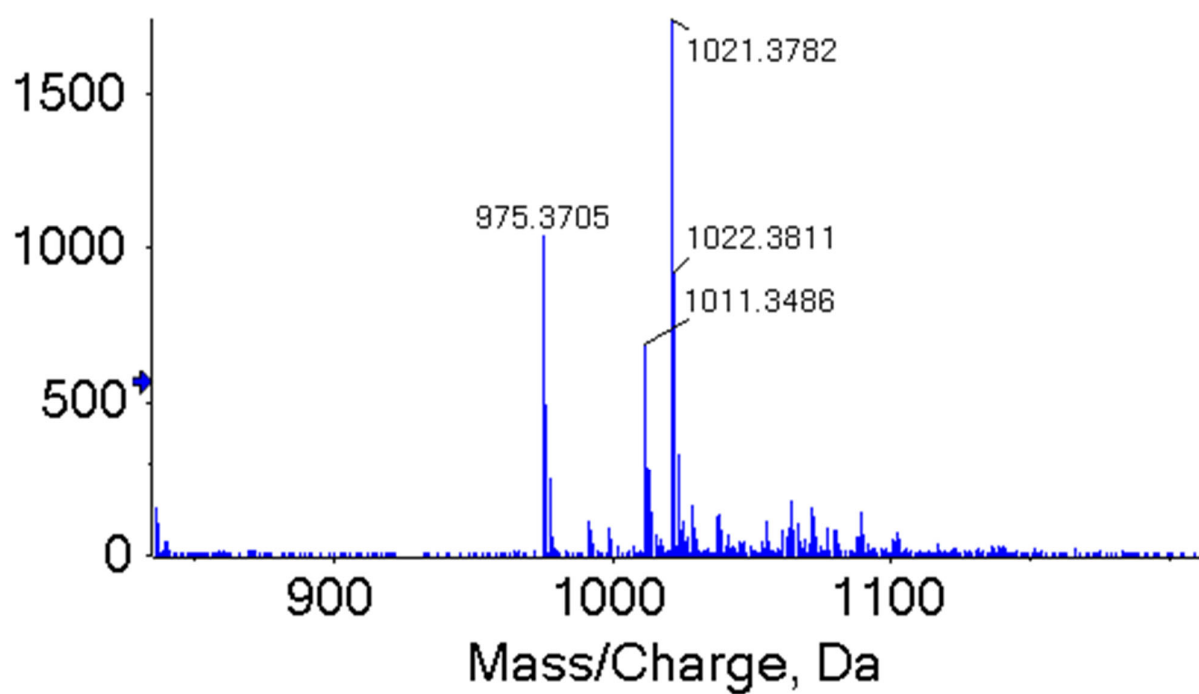

Figure 5. ESI-MS spectrum of compound 1.

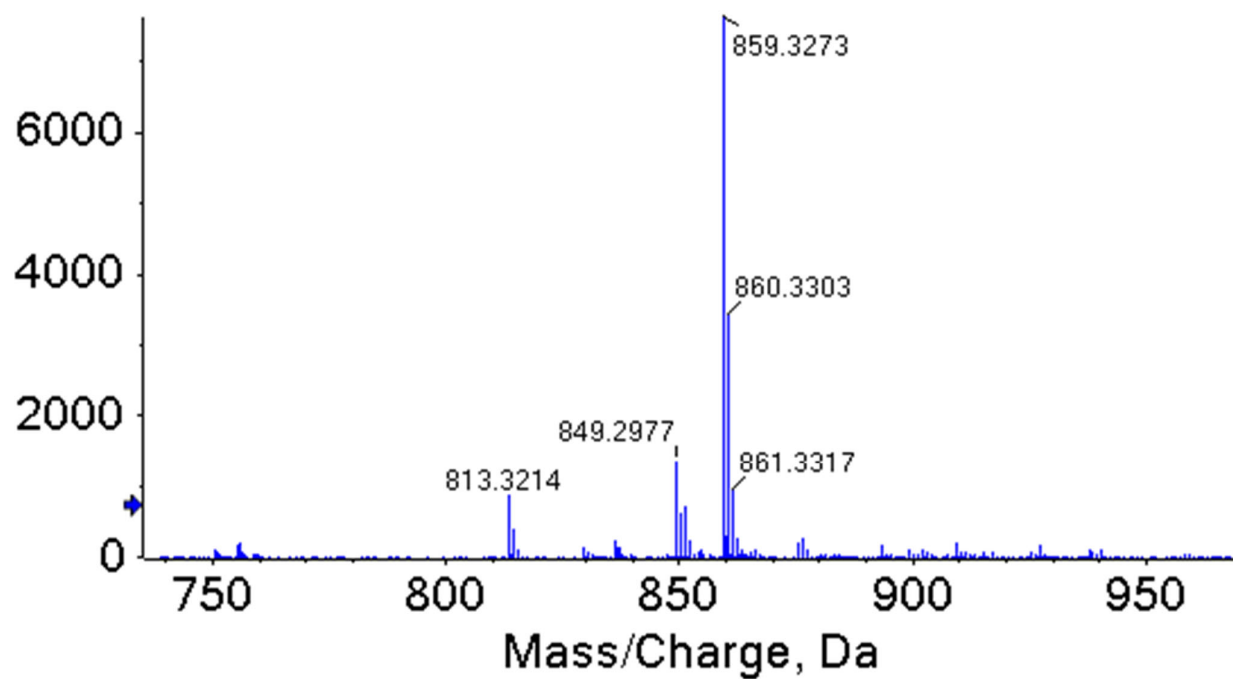

Figure S6. ESI-MS spectrum of compound 2.
